# Supplementary material for: Characteristics of people with low health literacy on coronary heart disease GP registers in South London: a cross-sectional study
Source: PubMed Central journal article supplement — BMJ Open. 2013 Jan 3;3(1):e001503. doi: 10.1136/bmjopen-2012-001503 (PMC3549254; doi:10.1136/bmjopen-2012-001503), 2013-01-03
Supplement: bmjopen-2012-001503.draft_revisions.pdf [file bmjopen-2012-001503.draft_revisions.pdf]

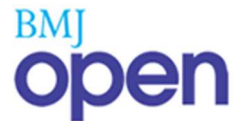

## Characteristics of people with low health literacy on coronary heart disease GP registers in South London

|                                 |                                                                                                                                                                                                                                                                                                                                                                                                                                                                                                                                                                                                                                                               |
|---------------------------------|---------------------------------------------------------------------------------------------------------------------------------------------------------------------------------------------------------------------------------------------------------------------------------------------------------------------------------------------------------------------------------------------------------------------------------------------------------------------------------------------------------------------------------------------------------------------------------------------------------------------------------------------------------------|
| Journal:                        | <i>BMJ Open</i>                                                                                                                                                                                                                                                                                                                                                                                                                                                                                                                                                                                                                                               |
| Manuscript ID:                  | bmjopen-2012-001503                                                                                                                                                                                                                                                                                                                                                                                                                                                                                                                                                                                                                                           |
| Article Type:                   | Research                                                                                                                                                                                                                                                                                                                                                                                                                                                                                                                                                                                                                                                      |
| Date Submitted by the Author:   | 03-Aug-2012                                                                                                                                                                                                                                                                                                                                                                                                                                                                                                                                                                                                                                                   |
| Complete List of Authors:       | Rowlands, Gillian; London South Bank University, Institute of Primary Care and Public Health<br>Mehay, Anita; Institute of Psychiatry, Section of Primary Care Mental Health<br>Hampshire, Sally; Institute of Psychiatry, Section of Primary Care Mental Health<br>Phillips, Rachel; Institute of Psychiatry, Section of Primary Care Mental Health<br>Mann, Anthony; Institute of Psychiatry, Health Service and Population Research<br>Steptoe, Andrew; University College London, UCL Institute of Epidemiology and Health Care<br>Walters, Paul; Institute of Psychiatry, Section of Primary Care Mental Health<br>Tylee, Andre; Institute of Psychiatry |
| <b>Primary Subject Heading</b>: | Public health                                                                                                                                                                                                                                                                                                                                                                                                                                                                                                                                                                                                                                                 |
| Secondary Subject Heading:      | General practice / Family practice                                                                                                                                                                                                                                                                                                                                                                                                                                                                                                                                                                                                                            |
| Keywords:                       | Health literacy, Cardiovascular disease, Prevalence                                                                                                                                                                                                                                                                                                                                                                                                                                                                                                                                                                                                           |
|                                 |                                                                                                                                                                                                                                                                                                                                                                                                                                                                                                                                                                                                                                                               |

SCHOLARONE™  
Manuscripts

1  
2  
3 **Characteristics of people with low health literacy on coronary heart**  
4 **disease GP registers in South London**

5  
6 **Lead, corresponding author and paper guarantor**

7  
8 **Gill Rowlands<sup>1</sup>**  
9

10  
11 Professor of Health Disparities  
12 Faculty of Health and Social Care  
13 London South Bank University  
14 London SE1 0AA  
15  
16 rowlang2@lsbu.ac.uk  
17  
18  
19

20  
21 **Co-authors**  
22

23  
24 **Anita Mehay<sup>2</sup>** BSc (Hons) MSc. Research Assistant  
25

26 **Sally Hampshire<sup>1</sup>** BSc MSc Research Assistant  
27

28 **Rachel Phillips<sup>2</sup>** BSc MSc GradStat. Research Fellow  
29

30 **Anthony Mann<sup>2</sup>** MD FRCP FRCPsych. Emeritus Professor  
31

32 **Andrew Steptoe<sup>3</sup>** BA MA DPhil DSC. British Heart Foundation Professor of  
33 Psychology  
34

35 **Paul Walters<sup>2</sup>** PhD MRCPsych. Research Fellow  
36

37 **Andre Tylee<sup>2</sup>** MD FRCGP MRCPsych. Head, Section of Primary Care Mental  
38 Health  
39

40  
41 **Word count: abstract 300 words, main text 1096 words.**  
42  
43

44  
45 **Study design:** cross-sectional survey  
46

47  
48 **Statements:** The Corresponding Author has the right to grant on behalf of all  
49 authors and does grant on behalf of all authors, an exclusive licence (or non  
50 exclusive for government employees) on a worldwide basis to the BMJ  
51 Publishing Group Ltd to permit this article (if accepted) to be published in BMJ  
52  
53  
54

55  
56 <sup>1</sup> London South Bank University

57 <sup>2</sup> Institute of Psychiatry, Kings College London

58 <sup>3</sup> University College London  
59  
60

1  
2  
3 editions and any other BMJ PGL products and sublicences such use and  
4 exploit all subsidiary rights, as set out in their licence.  
5  
6  
7

8 Competing interests: AT is partly employed by the NIHR Institute of Psychiatry  
9 and South London and Maudsley Foundation Trust Mental Health Biomedical  
10 Research Centre.  
11  
12

13  
14 Funding Statement: this research received no specific funding.  
15  
16

17  
18 Data Sharing Statement: There are no additional unpublished data from this  
19 study  
20  
21

22  
23 All authors have completed the Unified Competing Interest form  
24 **at [www.icmje.org/coi\\_disclosure.pdf](http://www.icmje.org/coi_disclosure.pdf)** (available on request from the  
25 corresponding author) and declare: no support from any organisation for the  
26 submitted work, no financial relationships with any organisations that might  
27 have an interest in the submitted work in the previous three years, no other  
28 relationships or activities that could appear to have influenced the submitted  
29 work.  
30  
31  
32  
33  
34  
35

### 36 **Contributions:**

37  
38 GR Led on development of the research idea, contributed to interpretation of  
39 result, and led on writing the paper  
40

41 AM collected research data and contributed to interpretation of results and  
42 writing the paper  
43

44 SH collected research data and contributed to interpretation of results and  
45 writing the paper  
46  
47

48 RP led on statistical analysis of the data and interpretation of the results  
49

50 AM co-developed the UPBEAT cohort study in which the study is sited,  
51 contributed to the research idea, contributed to interpretation of results and  
52 writing the paper  
53

54 AS contributed to the project design, analysis of results and writing the paper  
55

56 PW contributed to the research idea, interpretation of the results and writing  
57 the paper  
58  
59  
60

1  
2  
3 AT led o the development of the UPBEAT cohort study in which the study is  
4 sited, contributed to the research idea, contributed to interpretation of results  
5 and writing the paper  
6  
7  
8

9  
10 All authors have approved the final version

11 **Abstract (300 words)**

12  
13 *Objective.* To explore characteristics associated with, and prevalence of, low  
14 health literacy in patients recruited to investigate the role of depression in  
15 patients on General Practice (GP) Coronary Heart Disease (CHD) registers  
16 (the Up-Beat UK study).  
17  
18

19  
20 *Design.* Cross-sectional cohort. The health literacy measure was the Rapid  
21 Estimate of Health Literacy in Medicine (REALM). Univariable analyses  
22 identified characteristics associated with low health literacy and compared  
23 health service use between health literacy statuses. Those variables where  
24 there was a statistically significant/borderline significant difference between  
25 health literacy statuses were entered into a multivariable model.  
26  
27  
28

29  
30 *Setting.* 16 general practices in south London, UK.

31  
32 *Participants:* Inclusion: patients >18 years, registered with a GP and on a GP  
33 CHD register. Exclusion: patients temporarily registered.  
34

35  
36 *Primary outcome measure:* REALM.

37  
38 *Results.* Of the 803 Up-Beat cohort participants, 687 (85.55%) completed the  
39 REALM of whom 92 (13.39%) had low health literacy. A further 28 participants  
40 were excluded from the multivariable analysis due to missing predictor  
41 variable data, leaving a sample of 659. The variables remaining in the final  
42 model were age, gender, ethnicity, IMD score, years of education,  
43 employment; BMI and alcohol intake, and anxiety scores (Hospital Anxiety  
44 and Depression Scale (HADS)). Univariable analysis also showed that people  
45 with low health literacy may have more, and longer, practice nurse  
46 consultations than people with adequate health literacy.  
47  
48  
49

50  
51 *Conclusions.* There is a disadvantaged group of people on GP CHD registers  
52 with low health literacy. The multivariable model showed that patients with low  
53 health literacy have significantly higher anxiety levels than people with  
54 adequate health literacy. In addition, the univariable analyses show that such  
55 patients have more, and longer, consultations with practice nurses. We will  
56  
57  
58  
59  
60

1  
2  
3 collect 4-year longitudinal cohort data to explore the impact of health literacy  
4 in people on GP CHD registers and the impact of health literacy on health  
5 service use.  
6  
7  
8  
9

## 10 11 **Introduction**

12 Health literacy, 'the cognitive and social skills that determine the motivation  
13 and ability of individuals to (access), understand and use information in ways  
14 that promote and maintain good health' (1) is a social determinant of health  
15 (2). Whilst associated with other social determinants e.g. ethnicity, income,  
16 education, and socio-demographic status (SES), it has an independent  
17 association with poorer health (3). There are no data on health literacy levels  
18 in England; however the 2011 national skills survey has shown that 15% of  
19 the adult population (=5 million people) are 'functionally illiterate' (4) (i.e. have  
20 insufficient literacy skills to achieve their potential in life and society (5)). It is  
21 reasonable to assume that a similar proportion also have low health literacy.  
22  
23  
24  
25  
26  
27  
28  
29  
30

31 Low health literacy has greatest impact in complex health conditions when  
32 patients have to understand procedures, manage medication, and attend  
33 multiple appointments. US studies have shown that adults with low health  
34 literacy have a higher prevalence of diabetes and heart failure, worse physical  
35 and mental health, and higher all-cause mortality (6). There is little research  
36 on low health literacy and coronary heart disease (CHD), prompting us to  
37 explore this within a longitudinal cohort of patients recruited to investigate the  
38 role of depression in patients on General Practice (GP) CHD registers (7).  
39 This short report presents initial findings on the prevalence and characteristics  
40 of people with CHD and low health literacy.  
41  
42  
43  
44  
45  
46  
47  
48

## 49 **Method**

50 The design, recruitment, power calculation, and measures used in the Up-  
51 Beat cohort study were granted ethical approval by the Bexley and Greenwich  
52 Research Ethics Committee (REC Reference: 07/H0809/38) (7). Health  
53 literacy was measured using the Rapid Estimate of Health Literacy in  
54 Medicine (REALM) (8), a 66-item health word pronunciation test highly  
55  
56  
57  
58  
59  
60

1  
2  
3 correlated with other measures of health literacy (9, 10) and widely used in  
4 research studies (3). People with a score of < 58 out of the possible 66 are  
5 considered to have low health literacy.  
6  
7

8  
9  
10 Study design. A cross-sectional analysis of baseline data from the Up-Beat  
11 UK Cohort Study (7).  
12

### 13 14 15 Statistical Analysis

16 In order to identify the factors to be entered into the multivariable regression  
17 model, the characteristics of those with low health literacy were compared to  
18 those with adequate health literacy using  $\chi^2$  tests (categorical variables) and t-  
19 tests (continuous variables). Those characteristics where there was a  
20 statistically significant ( $p < 0.05$ ) or borderline significant difference between  
21 people with low and adequate health literacy were entered into a multivariable  
22 model; logistic regression was used to model predictors of low health literacy.  
23 The fit for the model was assessed by the C statistic (ROC curve) and the  
24 Hosmer-Lemeshow goodness of fit  $\chi^2$  test.  
25  
26  
27  
28  
29  
30  
31  
32

33 Analyses were performed using Stata version 11.2.  
34  
35

### 36 **Results**

37  
38  
39 Cohort characteristics are detailed elsewhere (7). Cohort recruitment and a  
40 study flow diagram are shown in figure 1.  
41  
42  
43

44  
45 *Figure about here.*  
46  
47

48 The results of the univariable and multivariable analyses are shown in table 1.  
49  
50  
51  
52  
53  
54  
55  
56  
57  
58  
59  
60

Table: Characteristics by Health Literacy

|                                                                                                           |                       | Health Literacy |               | Univariable analysis                       | Multivariable analysis                                 |
|-----------------------------------------------------------------------------------------------------------|-----------------------|-----------------|---------------|--------------------------------------------|--------------------------------------------------------|
|                                                                                                           |                       | Adequate        | Low           |                                            |                                                        |
|                                                                                                           |                       | N (%)           | N (%)         | N=687                                      | N=659                                                  |
| Total                                                                                                     |                       | 595 (86.61)     | 92 (13.39)    |                                            |                                                        |
|                                                                                                           |                       |                 |               | P-value <sup>(1)</sup>                     | Adjusted odds of having low health literacy (p-values) |
| <b>Socio-demographic characteristics</b>                                                                  |                       |                 |               |                                            |                                                        |
| Gender                                                                                                    | Male                  | 409 (68.74)     | 75 (81.52)    | 0.012                                      | 0.36 (<0.001)                                          |
|                                                                                                           | Female                | 186 (31.26)     | 17 (18.48)    |                                            |                                                        |
| Ethnicity                                                                                                 | White                 | 536 (90.08)     | 69 (75.00)    | <0.001                                     | 3.33 (<0.001)                                          |
|                                                                                                           | Other                 | 59 (9.92)       | 23 (25.00)    |                                            |                                                        |
| Age, Mean (SD)                                                                                            | Years                 | 71.13 (10.40)   | 68.62 (12.09) | 0.061 <sup>(2)</sup>                       | 1.00 (0.933)                                           |
| Index of Multiple Deprivation score, Mean (SD)                                                            | Range 0-100           | 18.37 (13.75)   | 25.10 (13.59) | <0.001                                     | 1.02 (0.056)                                           |
| Time in education, Mean (SD)                                                                              | Years                 | 11.99 (3.37)    | 10.90 (2.57)  | <0.001 <sup>(2)</sup>                      | 0.83 (<0.001)                                          |
| Employment status                                                                                         | Unemployed/student    | 14 (2.36)       | 10 (10.99)    | <0.001                                     | 0.063                                                  |
|                                                                                                           | Paid employment       | 120 (20.24)     | 15 (16.48)    |                                            |                                                        |
|                                                                                                           | Retired/Housewife     | 459 (77.40)     | 66 (72.53)    |                                            |                                                        |
| <b>Lifestyle Characteristics</b>                                                                          |                       |                 |               |                                            |                                                        |
| Alcohol intake (Units)                                                                                    | Doesn't drink         | 139 (23.40)     | 41 (45.05)    | <0.001                                     | <0.001                                                 |
|                                                                                                           | 1-10 units            | 297 (50.00)     | 36 (39.56)    |                                            |                                                        |
|                                                                                                           | 11-20 units           | 89 (14.98)      | 7 (7.69)      |                                            |                                                        |
|                                                                                                           | Greater than 21 units | 69 (11.62)      | 7 (7.69)      |                                            |                                                        |
| BMI                                                                                                       | Underweight/Normal    | 147 (25.34)     | 13 (14.29)    | 0.035                                      | 0.033                                                  |
|                                                                                                           | Overweight            | 257 (44.31)     | 41 (45.05)    |                                            |                                                        |
|                                                                                                           | Obese                 | 176 (30.34)     | 37 (40.66)    |                                            |                                                        |
| <b>Mental Health</b>                                                                                      |                       |                 |               |                                            |                                                        |
| Depression score, Mean (SD)                                                                               |                       | 2.93 (3.21)     | 4.07 (3.55)   | 0.002                                      |                                                        |
| Anxiety score, Mean (SD)                                                                                  |                       | 4.47 (4.23)     | 6.16 (4.96)   | 0.002 <sup>(2)</sup>                       | 1.06 (0.035)                                           |
| <b>Health utilisation in the 6 months prior to baseline</b>                                               |                       |                 |               |                                            |                                                        |
| Number of practice nurse visits, Mean (SD)                                                                |                       | 0.92 (1.89)     | 1.21 (2.01)   | 0.044 <sup>(3)</sup>                       |                                                        |
| Duration of practice nurse visit, Mean (SD)                                                               |                       | 5.06 (7.08)     | 6.79 (8.41)   | 0.034 <sup>(3)</sup>                       |                                                        |
| All other service use variables <sup>(4)</sup>                                                            |                       |                 |               | 0.191 <sup>(5)</sup> -0.990 <sup>(6)</sup> |                                                        |
| <sup>1</sup> P-value from t-test for continuous variables and chi-squared tests for categorical variables |                       |                 |               |                                            |                                                        |
| <sup>2</sup> Unequal variances t-test used                                                                |                       |                 |               |                                            |                                                        |
| <sup>3</sup> Wilcoxon rank sum test                                                                       |                       |                 |               |                                            |                                                        |

<sup>4</sup> Number of Accident and Emergency visits, Day hospital and in-patient admissions (days), outpatient visits, GP visits (number, duration), district nurse visits (number, duration), other medical visits (number, duration), other care based visits (number, duration), informal care visits number).

<sup>5</sup> Number of Accident and Emergency visits

<sup>6</sup> Number (days) in-patient visits

Of the 803 cohort participants 687 (85.55%) completed the REALM questionnaire. The 116 non-responders were excluded from the analyses. Non-responders lived in more socio-economically deprived areas and had received fewer years of education than those who completed the REALM. There was no difference in ethnicity (responders vs non-responders).

Of the 687 participants who completed the REALM, 92 (13.39%) had low health literacy. For the multivariable analysis a further 28 patients were excluded due to missing predictor variable data, leaving a total sample of 659.

The variables remaining in the final model were age, gender, ethnicity (white versus other), IMD score, years of education, employment; BMI and alcohol intake, and anxiety scores (Hospital Anxiety and Depression Scale (HADS)) (11). There was a 6% increase in the odds of low health literacy for every single unit increase in the anxiety score on HADS (range 0-21).

The association between health literacy and IMD scores and employment were borderline significant. There was no significant difference in age.

Service use analysis (univariable only) showed that people with low health literacy had significantly more, and longer, GP practice nurse consultations than people with adequate health literacy, but other service use showed no differences between groups.

## Discussion

### *Key findings*

This study confirms that the characteristics of patients with low health literacy on UK GP CHD registers are similar to those seen in other long-term conditions in studies undertaken in other industrialised countries (i.e.,



1  
2  
3 membership of a minority ethnic group, socio-economic deprivation, fewer  
4 years in education, and lower income (6)). The prevalence of low health  
5 literacy is close to that predicted from national general literacy levels (4).  
6  
7

8  
9  
10 In addition people on GP CHD registers who have higher anxiety levels are  
11 more likely to have low health literacy than people with lower anxiety levels.  
12 This persists in the multivariable model, indicating an association over and  
13 above that already known to exist between anxiety and low socio-economic  
14 status (12, 13). This may reflect the findings of Ussher et al that CHD patients  
15 with low health literacy have increased difficulty understanding information,  
16 less knowledge of heart problems, and increased discomfort about asking for  
17 explanations (14). The finding in the univariable analysis that patients with low  
18 health literacy had more contact with practice nurses but not with other health  
19 services requires further investigation.  
20  
21  
22  
23  
24  
25  
26

### 27 28 *Study limitations*

29 As a cross-sectional study this project cannot demonstrate causality or the  
30 impact of low health literacy over time.  
31  
32  
33

34 Our findings may underestimate of the true picture; the 14.45% of participants  
35 who declined to do the REALM share the characteristics of people with low  
36 health literacy and may have declined because of reading difficulties.  
37  
38  
39

40 Our findings of more frequent, and longer, GP practice nurse consultations  
41 should be interpreted with caution, as this was found during univariable  
42 analysis with no other factors controlled for; no service use data were entered  
43 into the multivariable model. The above preliminary finding thus requires more  
44 detailed health economic analysis and interpretation.  
45  
46  
47  
48

49 Finally, the REALM, although highly correlated with tests of functional health  
50 and general literacy, is not itself a test of functional skills but of pronunciation.  
51  
52  
53  
54

### 55 56 *Summary*

57  
58  
59  
60

1  
2  
3 Our findings indicate that there is a disadvantaged group of people on GP  
4 CHD registers who have low health literacy in addition to other socio-  
5 demographic barriers to health. A new finding is that these people have  
6 significantly higher anxiety levels than people with adequate health literacy.  
7  
8  
9

### 10 11 *Next steps*

12 Our possible finding that people on GP CHD registers with lower health  
13 literacy consulted practice nurses more frequently will inform future Up-Beat  
14 pilot interventions (7) and our longitudinal cohort data will enable us to explore  
15 the impact of low health literacy on patients on GP CHD registers, and on  
16 their health service use.  
17  
18  
19  
20  
21

### 22 23 **Acknowledgements**

24 Many thanks to the 16 South London practices who participated in the  
25 UPBEAT-UK study.  
26  
27  
28

29 This report/article presents independent research commissioned by the  
30 National Institute for Health Research (NIHR) under its Programme Grants for  
31 Applied Research scheme (RP-PG-0606-1048). The views expressed in this  
32 publication are those of the author(s) and not necessarily those of the NHS,  
33 the NIHR or the Department of Health.  
34  
35  
36  
37  
38

39 AT is partly employed by the NIHR Institute of Psychiatry and South London  
40 and Maudsley Foundation Trust Mental Health Biomedical Research Centre.  
41  
42  
43  
44  
45  
46  
47  
48  
49  
50  
51  
52  
53  
54  
55  
56  
57  
58  
59  
60

## References

- 1 Health Literacy: A Prescription to End Confusion. Washington DC: Institute of Medicine, 2004.
- 2 CSDH. Closing the gap in a generation: health equity through action on the social determinants of health. Final Report of the Commission on Social Determinants of Health. Geneva: World Health Organization, 2008.
- 3 Paasche-Orlow MK, Parker RM, Gazmararian JA, et al. The prevalence of limited health literacy. *J Gen Intern Med.* 2005;**20**(2):175-84. Epub 2005/04/20.
- 4 Skills for Life Survey: Headline Findings. Department for Business Innovations and Skills 2011 Research Report No.: 57.
- 5 Moser C. A fresh start: the report of the working party on literacy and numeracy. 1999:-.
- 6 Wolf MS, Gazmararian JA, Baker DW. Health literacy and functional health status in older adults. *Arch Int Med.* 2005;**165**:1946-52.
- 7 Tylee A, Ashworth M, Barley E, et al. Up-Beat UK: A programme of research into the relationship between coronary heart disease and depression in primary care patients. *BMC Family Practice.* 2011;**12**:38doi:10.1186/1471-2296-12-38.
- 8 Davis TC, Long SW, Jackson RH, et al. Rapid Estimate of Adult Literacy in Medicine: A Shortened Screening Instrument. *Family Medicine.* 1993;**25**(6):391-5.
- 9 Parker RM, Baker DW, Williams MV, et al. The Test of Functional Health Literacy in Adults (TOFHLA): a new instrument for measuring patients' literacy skills. *J Gen Intern Med.* 1995;**10**:537-42.
- 10 Weiss BD, Mays MZ, Martz W, et al. Quick assessment of literacy in primary care: the newest vital sign. *Ann Fam Med.* 2005;**3**(6):514-22. Epub 2005/12/13.

1  
2  
3 11 Hamilton M. Development of a rating scale for primary depressive illness.  
4 Br J Soc Clin Psychol. 1967;**6**(4):278-96. Epub 1967/12/01.

5  
6 12 Wolff BC, Santiago CD, Wadsworth ME. Poverty and involuntary  
7 engagement stress responses: examining the link to anxiety and aggression  
8 within low-income families. Anxiety Stress Coping. 2009;**22**(3):309-25. Epub  
9 2009/03/03.

10  
11  
12 13 Najman JM, Hayatbakhsh MR, Clavarino A, et al. Family poverty over the  
14 early life course and recurrent adolescent and young adult anxiety and  
15 depression: a longitudinal study. Am J Public Health. 2010;**100**(9):1719-23.  
16 Epub 2010/07/17.

17  
18  
19 14 Ussher M, Ibrahim S, Reid F, et al. Psychosocial correlates of health  
20 literacy among older patients with coronary heart disease. J Health Commun.  
21 2010;**15**(7):788-804. Epub 2010/11/26.  
22  
23  
24  
25  
26  
27  
28  
29  
30  
31  
32  
33  
34  
35  
36  
37  
38  
39  
40  
41  
42  
43  
44  
45  
46  
47  
48  
49  
50  
51  
52  
53  
54  
55  
56  
57  
58  
59  
60

**Exploring indicators of low health literacy in a cohort with symptomatic Coronary Heart Disease**

**Figure: Study recruitment: Consort diagram**

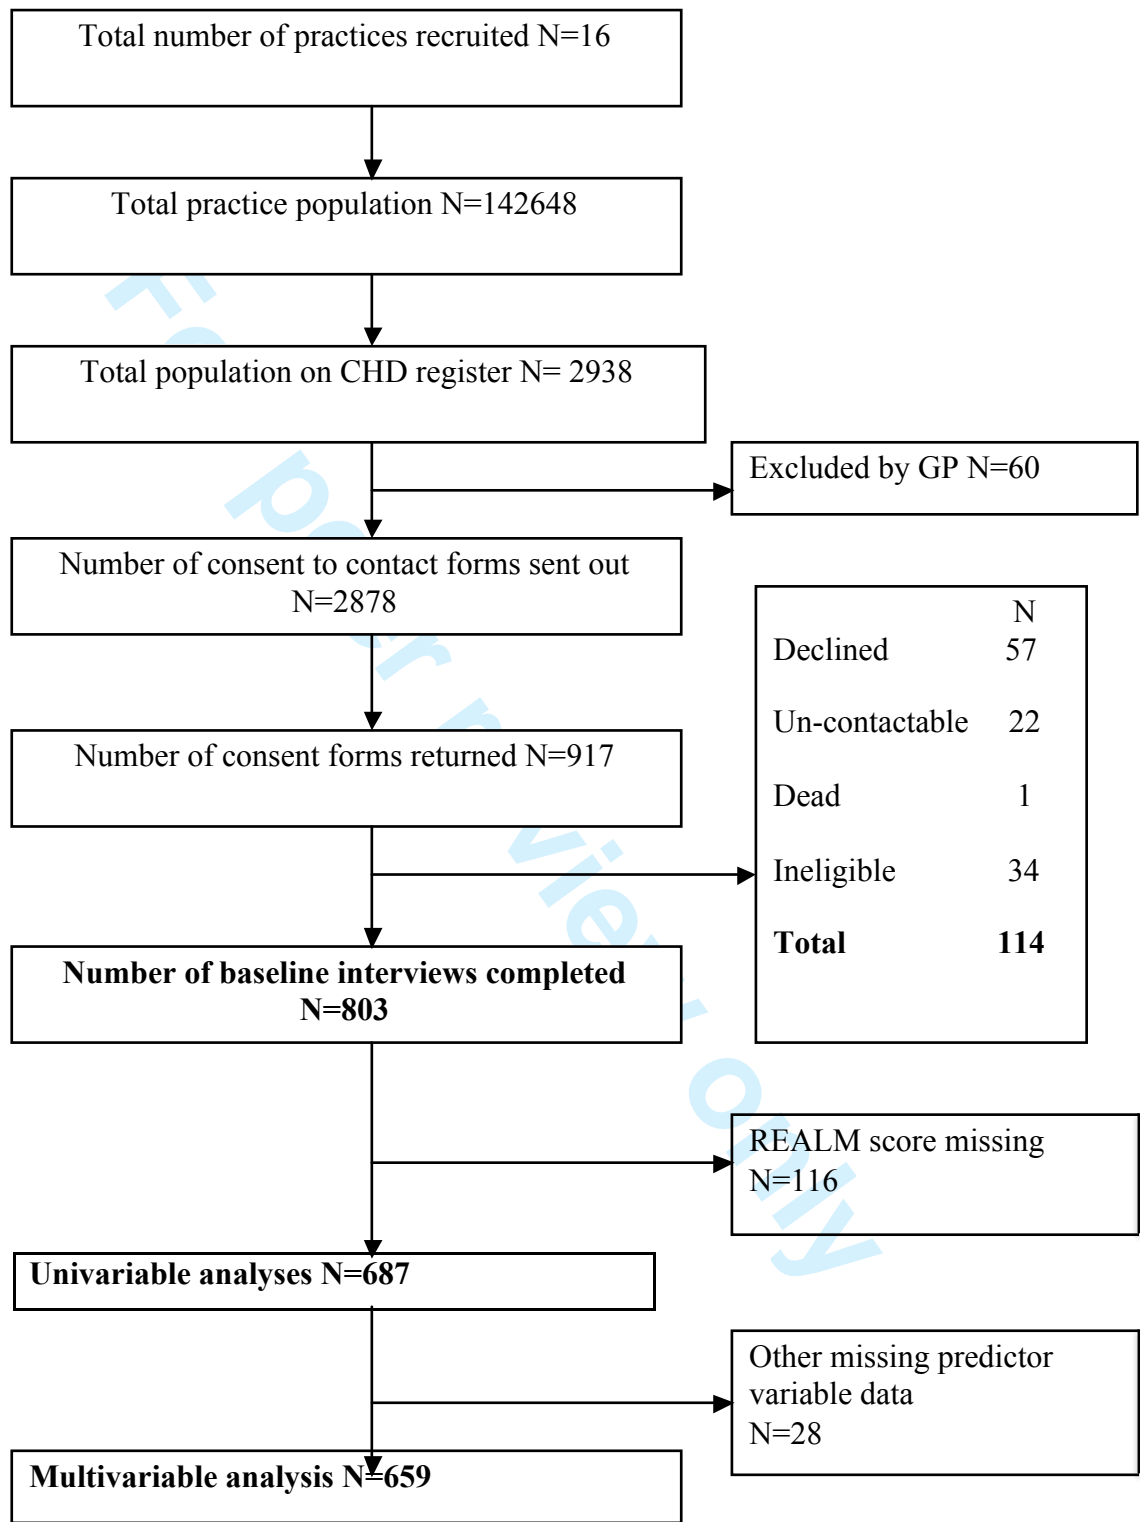



## Characteristics of people with low health literacy on coronary heart disease GP registers in South London

|                                 |                                                                                                                                                                                                                                                                                                                                                                                                                                                                                                                                                                                                                                                                                                                                                 |
|---------------------------------|-------------------------------------------------------------------------------------------------------------------------------------------------------------------------------------------------------------------------------------------------------------------------------------------------------------------------------------------------------------------------------------------------------------------------------------------------------------------------------------------------------------------------------------------------------------------------------------------------------------------------------------------------------------------------------------------------------------------------------------------------|
| Journal:                        | <i>BMJ Open</i>                                                                                                                                                                                                                                                                                                                                                                                                                                                                                                                                                                                                                                                                                                                                 |
| Manuscript ID:                  | bmjopen-2012-001503.R1                                                                                                                                                                                                                                                                                                                                                                                                                                                                                                                                                                                                                                                                                                                          |
| Article Type:                   | Research                                                                                                                                                                                                                                                                                                                                                                                                                                                                                                                                                                                                                                                                                                                                        |
| Date Submitted by the Author:   | 19-Oct-2012                                                                                                                                                                                                                                                                                                                                                                                                                                                                                                                                                                                                                                                                                                                                     |
| Complete List of Authors:       | Rowlands, Gillian; London South Bank University, Institute of Primary Care and Public Health<br>Mehay, Anita; Institute of Psychiatry, Section of Primary Care Mental Health<br>Hampshire, Sally; Institute of Psychiatry, Section of Primary Care Mental Health<br>Phillips, Rachel; Institute of Psychiatry, Section of Primary Care Mental Health<br>Williams, Paul; Institute of Psychiatry, Section of Primary Care Mental Health<br>Mann, Anthony; Institute of Psychiatry, Health Service and Population Research<br>Steptoe, Andrew; University College London, UCL Institute of Epidemiology and Health Care<br>Walters, Paul; Institute of Psychiatry, Section of Primary Care Mental Health<br>Tylee, Andre; Institute of Psychiatry |
| <b>Primary Subject Heading</b>: | Public health                                                                                                                                                                                                                                                                                                                                                                                                                                                                                                                                                                                                                                                                                                                                   |
| Secondary Subject Heading:      | General practice / Family practice, Cardiovascular medicine, Sociology, Mental health                                                                                                                                                                                                                                                                                                                                                                                                                                                                                                                                                                                                                                                           |
| Keywords:                       | Health literacy, Cardiovascular disease, Prevalence                                                                                                                                                                                                                                                                                                                                                                                                                                                                                                                                                                                                                                                                                             |
|                                 |                                                                                                                                                                                                                                                                                                                                                                                                                                                                                                                                                                                                                                                                                                                                                 |

SCHOLARONE™  
Manuscripts

1  
2  
3 **Characteristics of people with low health literacy on coronary heart**  
4 **disease GP registers in South London**

5  
6 **Lead, corresponding author and paper guarantor**

7  
8 **Gill Rowlands<sup>1</sup>**

9  
10 Professor of Health Disparities

11 Faculty of Health and Social Care

12 London South Bank University

13 London SE1 0AA

14 rowlang2@lsbu.ac.uk  
15  
16  
17  
18  
19

20 **Co-authors**

21 **Anita Mehay<sup>2</sup>** BSc (Hons) MSc. Research Assistant

22 **Sally Hampshire<sup>1</sup>** BSc MSc Research Assistant

23 **Rachel Phillips<sup>2</sup>** BSc MSc GradStat. Research Fellow

24 **Paul Williams<sup>2</sup>** BSc MPH. Statistician.

25 **Anthony Mann<sup>2</sup>** MD FRCP FRCPsych. Emeritus Professor

26 **Andrew Steptoe<sup>3</sup>** BA MA DPhil DSC. British Heart Foundation Professor of  
27 Psychology

28 **Paul Walters<sup>2</sup>** PhD MRCPsych. Research Fellow

29 **Andre Tylee<sup>2</sup>** MD FRCGP MRCPsych. Head, Section of Primary Care Mental  
30 Health  
31  
32

33  
34  
35 **Word count: abstract 300 words, main text 1303 words.**  
36  
37  
38  
39

40  
41  
42 **Study design:** cross-sectional survey  
43  
44  
45

46 **Statements:** The Corresponding Author has the right to grant on behalf of all  
47 authors and does grant on behalf of all authors, an exclusive licence (or non  
48 exclusive for government employees) on a worldwide basis to the BMJ  
49 Publishing Group Ltd to permit this article (if accepted) to be published in BMJ  
50 editions and any other BMJ PGL products and sublicences such use and  
51  
52  
53  
54

55  
56 <sup>1</sup> London South Bank University

57 <sup>2</sup> Institute of Psychiatry, Kings College London

58 <sup>3</sup> University College London  
59  
60

1  
2  
3 exploit all subsidiary rights, as set out in their licence.  
4  
5

6 Competing interests: AT is partly employed by the NIHR Institute of Psychiatry  
7 and South London and Maudsley Foundation Trust Mental Health Biomedical  
8 Research Centre.  
9  
10

11  
12 All authors have completed the Unified Competing Interest form  
13 **at**[www.icmje.org/coi\\_disclosure.pdf](http://www.icmje.org/coi_disclosure.pdf) (available on request from the  
14 corresponding author) and declare: no support from any organisation for the  
15 submitted work, no financial relationships with any organisations that might  
16 have an interest in the submitted work in the previous three years, no other  
17 relationships or activities that could appear to have influenced the submitted  
18 work.  
19  
20  
21  
22  
23

24 **Contributions:**

25  
26 GR Led on development of the research idea, contributed to interpretation of  
27 result, and led on writing the paper  
28

29 AM collected research data and contributed to interpretation of results and  
30 writing the paper  
31

32 SH collected research data and contributed to interpretation of results and  
33 writing the paper  
34

35 RP led on statistical analysis of the data and interpretation of the results  
36

37 PW conducted additional statistical analysis and contributed to the paper  
38

39 AM co-developed the UPBEAT cohort study in which the study is sited,  
40 contributed to the research idea, contributed to interpretation of results and  
41 writing the paper  
42  
43

44 AS contributed to the project design, analysis of results and writing the paper  
45

46 PW contributed to the research idea, interpretation of the results and writing  
47 the paper  
48

49 AT led on the development of the UPBEAT cohort study in which the study is  
50 sited, contributed to the research idea, contributed to interpretation of results  
51 and writing the paper.  
52  
53  
54

55  
56 All authors have approved the final version  
57  
58  
59  
60



**Abstract (299 words)**

*Objective.* To explore characteristics associated with, and prevalence of, low health literacy in patients recruited to investigate the role of depression in patients on General Practice (GP) Coronary Heart Disease (CHD) registers (the Up-Beat UK study).

*Design.* Cross-sectional cohort. The health literacy measure was the Rapid Estimate of Health Literacy in Medicine (REALM). Univariable analyses identified characteristics associated with low health literacy and compared health service use between health literacy statuses. Those variables where there was a statistically significant/borderline significant difference between health literacy statuses were entered into a multivariable model.

*Setting.* 16 general practices in south London, UK.

*Participants:* Inclusion: patients >18 years, registered with a GP and on a GP CHD register. Exclusion: patients temporarily registered.

*Primary outcome measure:* REALM.

*Results.* Of the 803 Up-Beat cohort participants, 687 (85.55%) completed the REALM of whom 106 (15.43%) had low health literacy. Twenty-eight participants could not be included in the multivariable analysis due to missing predictor variable data, leaving a sample of 659. The variables remaining in the final model were age, gender, ethnicity, IMD score, years of education, employment; BMI and alcohol intake, and anxiety scores (Hospital Anxiety and Depression Scale (HADS)). Univariable analysis also showed that people with low health literacy may have more, and longer, practice nurse consultations than people with adequate health literacy.

*Conclusions.* There is a disadvantaged group of people on GP CHD registers with low health literacy. The multivariable model showed that patients with low health literacy have significantly higher anxiety levels than people with adequate health literacy. In addition, the univariable analyses show that such patients have more, and longer, consultations with practice nurses. We will collect 4-year longitudinal cohort data to explore the impact of health literacy in people on GP CHD registers and the impact of health literacy on health service use.

## Article summary

### Article focus

- Identifying the prevalence and characteristics of people with CHD and low health literacy on coronary heart disease GP registers in South London, UK

### Key Messages

- The characteristics of patients with low health literacy on UK GP CHD registers are similar to those seen in other long-term conditions in studies undertaken in other industrialised countries
- The prevalence of low health literacy to be close to that predicted from national general literacy levels at 15%
- People on GP CHD registers who have higher anxiety levels are more likely to have low health literacy than people with lower anxiety levels

### Strengths

- The data were collected within a prospective cohort study
- There were a wide range of sociodemographic data collected enabling characteristics of patients with low health literacy to be described
- The simultaneous collection of psychological and service use data enabled these to be compared between patients with low and adequate health literacy

### Limitations

- As a cross-sectional study this project cannot demonstrate causality or the impact of low health literacy over time.
- The findings may underestimate of the true picture; the participants who declined to do the REALM may have declined because of reading difficulties.
- Our findings of more frequent, and longer, GP practice nurse consultations should be interpreted with caution; the above preliminary finding requires more detailed health economic analysis and interpretation
- The REALM, although highly correlated with tests of functional health and general literacy, is not itself a test of functional skills but of pronunciation

## Introduction

Health literacy, 'the cognitive and social skills that determine the motivation and ability of individuals to (access), understand and use information in ways that promote and maintain good health' (1) is a social determinant of health (2). Whilst associated with other social determinants e.g. ethnicity, income, education, and socio-demographic status (SES), it has an independent association with poor health (3). International comparisons of health literacy levels are hampered by differing national definitions; however it is clear that health literacy is an important issue in many industrialised nations. The proportion of the population thought to be disadvantaged through low health literacy ranges from 19% in the US (4) to 55% in Canada (5). A recent survey of health literacy in Europe, where a common definition of health literacy was adopted, shows a range of health literacy skills between nations, with the proportion of the population having suboptimal health literacy skills ranging from 27.3% in the Netherlands to 61.4% in Bulgaria (6). There are no data on health literacy levels in England; however the 2011 national skills survey has shown that 15% of the adult population (=5 million people) are 'functionally illiterate' (7) (i.e. have insufficient literacy skills to achieve their potential in life and society (8)). It is reasonable to assume that a similar proportion also have low health literacy.

Low health literacy has greatest impact in complex health conditions when patients have to understand procedures, manage medication, and attend multiple appointments. US studies have shown that adults with low health literacy have a higher prevalence of diabetes and heart failure, worse physical and mental health, and higher all-cause mortality (9). There is little research on low health literacy and coronary heart disease (CHD), prompting us to explore this within a longitudinal cohort of patients recruited to investigate the role of depression in patients on General Practice (GP) CHD registers (10). This short report presents initial findings on the prevalence and characteristics of people with CHD and low health literacy.

## Method

The design, recruitment, power calculation, and measures used in the Up-

1  
2  
3 Beat cohort study are described elsewhere (10). The study was granted  
4 ethical approval by the Bexley and Greenwich Research Ethics Committee  
5 (REC Reference: 07/H0809/38) (10). Health literacy was measured using the  
6 Rapid Estimate of Health Literacy in Medicine (REALM) (11), a 66-item health  
7 word pronunciation test highly correlated with other measures of health  
8 literacy (12, 13) and widely used in research studies (3). The version of the  
9 REALM validated for use in the UK was used. This groups people into 'low'  
10 and 'adequate' health literacy with people with a score of < 59 out of the  
11 possible 66 being considered to have low health literacy (14).  
12  
13  
14  
15  
16  
17  
18

19  
20 Study design. A cross-sectional analysis of baseline data from the Up-Beat  
21 UK Cohort Study (10).  
22  
23

### 24 Statistical Analysis

25  
26 Initial exploratory univariable analysis was undertaken to identify factors  
27 independently associated with low health literacy using  $\chi^2$  tests (categorical  
28 variables) and t-tests (continuous variables). Multivariable regression analysis  
29 was then undertaken to identify those factors that remained significant when  
30 all those identified in the univariable analysis were considered together.  
31 Those characteristics where there was a statistically significant ( $p < 0.05$ ) or  
32 borderline significant difference between people with low and adequate health  
33 literacy were entered into the multivariable model; logistic regression was  
34 used to model predictors of low health literacy. The fit for the model was  
35 assessed by the C statistic (ROC curve) and the Hosmer-Lemeshow  
36 goodness of fit  $\chi^2$  test.  
37  
38  
39  
40  
41  
42  
43  
44  
45

46 Analyses were performed using Stata version 11.2.  
47  
48

### 49 **Results**

50  
51  
52 Cohort characteristics are detailed elsewhere (10). Cohort recruitment and a  
53 study flow diagram are shown in figure 1.  
54  
55  
56  
57

58 *Figure about here.*  
59  
60

The results of the univariable and multivariable analyses are shown in table 1.

**Table: Characteristics by Health Literacy**

|                                                                                                                                                                                                                                                                                                                   |                       | Health Literacy |               | Univariable analysis                         | Multivariable analysis                                 |
|-------------------------------------------------------------------------------------------------------------------------------------------------------------------------------------------------------------------------------------------------------------------------------------------------------------------|-----------------------|-----------------|---------------|----------------------------------------------|--------------------------------------------------------|
|                                                                                                                                                                                                                                                                                                                   |                       | Adequate        | Low           |                                              |                                                        |
|                                                                                                                                                                                                                                                                                                                   |                       | N (%)           | N (%)         | N=687                                        | N=659                                                  |
| Total                                                                                                                                                                                                                                                                                                             |                       | 581 (84.57)     | 106 (15.43)   |                                              |                                                        |
|                                                                                                                                                                                                                                                                                                                   |                       |                 |               | P-value <sup>(1)</sup>                       | Adjusted odds of having low health literacy (p-values) |
| <b>Socio-demographic characteristics</b>                                                                                                                                                                                                                                                                          |                       |                 |               |                                              |                                                        |
| Gender                                                                                                                                                                                                                                                                                                            | Male                  | 397 (68.33)     | 87 (82.08)    | 0.004                                        | 0.32 (<0.001)                                          |
|                                                                                                                                                                                                                                                                                                                   | Female                | 184 (31.67)     | 19 (17.92)    |                                              |                                                        |
| Ethnicity                                                                                                                                                                                                                                                                                                         | White                 | 524 (90.19)     | 81 (76.42)    | <0.001                                       | 3.12 (<0.001)                                          |
|                                                                                                                                                                                                                                                                                                                   | Other                 | 57 (9.81)       | 25 (23.58)    |                                              |                                                        |
| Age, Mean (SD)                                                                                                                                                                                                                                                                                                    | Years                 | 71.14 (10.41)   | 68.92 (11.84) | 0.049                                        | 1.00 (0.873)                                           |
| Index of Multiple Deprivation score, Mean (SD)                                                                                                                                                                                                                                                                    | Range 0-100           | 18.34 (13.84)   | 24.37 (13.24) | <0.001                                       | 1.02 (0.072)                                           |
| Time in education, Mean (SD)                                                                                                                                                                                                                                                                                      | Years                 | 12.01 (3.40)    | 10.92 (2.46)  | <0.001 <sup>(2)</sup>                        | 0.84 (0.001)                                           |
| Employment status                                                                                                                                                                                                                                                                                                 | Unemployed/student    | 14 (2.42)       | 10 (9.52)     | 0.001                                        | 0.138                                                  |
|                                                                                                                                                                                                                                                                                                                   | Paid employment       | 117 (20.21)     | 18 (17.14)    |                                              |                                                        |
|                                                                                                                                                                                                                                                                                                                   | Retired/Housewife     | 448 (77.37)     | 77 (73.33)    |                                              |                                                        |
| <b>Lifestyle Characteristics</b>                                                                                                                                                                                                                                                                                  |                       |                 |               |                                              |                                                        |
| Alcohol intake (Units)                                                                                                                                                                                                                                                                                            | Doesn't drink         | 136 (23.45)     | 44 (41.90)    | 0.001                                        | 0.002                                                  |
|                                                                                                                                                                                                                                                                                                                   | 1-10 units            | 289 (49.83)     | 44 (41.90)    |                                              |                                                        |
|                                                                                                                                                                                                                                                                                                                   | 11-20 units           | 87 (15.00)      | 9 (8.57)      |                                              |                                                        |
|                                                                                                                                                                                                                                                                                                                   | Greater than 21 units | 68 (11.72)      | 8 (7.62)      |                                              |                                                        |
| BMI                                                                                                                                                                                                                                                                                                               | Underweight/Normal    | 145 (25.62)     | 15 (14.29)    | 0.024                                        | 0.027                                                  |
|                                                                                                                                                                                                                                                                                                                   | Overweight            | 250 (44.17)     | 48 (45.71)    |                                              |                                                        |
|                                                                                                                                                                                                                                                                                                                   | Obese                 | 171 (30.21)     | 42 (40.00)    |                                              |                                                        |
| <b>Mental Health</b>                                                                                                                                                                                                                                                                                              |                       |                 |               |                                              |                                                        |
| Depression score, Mean (SD)                                                                                                                                                                                                                                                                                       |                       | 2.86 (3.14)     | 4.28 (3.76)   | <0.001 <sup>(2)</sup>                        |                                                        |
| Anxiety score, Mean (SD)                                                                                                                                                                                                                                                                                          |                       | 4.39 (4.13)     | 6.35 (5.18)   | <0.001 <sup>(2)</sup>                        | 1.08 (0.002)                                           |
| <b>Health utilisation in the 6 months prior to baseline</b>                                                                                                                                                                                                                                                       |                       |                 |               |                                              |                                                        |
| Number of practice nurse visits, Mean (SD)                                                                                                                                                                                                                                                                        |                       | 0.89 (1.85)     | 1.33 (2.21)   | 0.008 <sup>(3)</sup>                         |                                                        |
| Duration of practice nurse visit, Mean (SD)                                                                                                                                                                                                                                                                       |                       | 4.98 (7.05)     | 6.98 (8.30)   | 0.008 <sup>(3)</sup>                         |                                                        |
| All other service use variables <sup>(4)</sup>                                                                                                                                                                                                                                                                    |                       |                 |               | 0.120 <sup>(5)</sup><br>0.793 <sup>(6)</sup> |                                                        |
| <sup>1</sup> P-value from t-test for continuous variables and chi-squared tests for categorical variables                                                                                                                                                                                                         |                       |                 |               |                                              |                                                        |
| <sup>2</sup> Unequal variances t-test used                                                                                                                                                                                                                                                                        |                       |                 |               |                                              |                                                        |
| <sup>3</sup> Wilcoxon rank sum test                                                                                                                                                                                                                                                                               |                       |                 |               |                                              |                                                        |
| <sup>4</sup> Number of Accident and Emergency visits, Day hospital and in-patient admissions (days), outpatient visits, GP visits (number, duration), district nurse visits (number, duration), other medical visits (number, duration), other care based visits (number, duration), informal care visits number. |                       |                 |               |                                              |                                                        |
| <sup>5</sup> Number of Accident and Emergency visits                                                                                                                                                                                                                                                              |                       |                 |               |                                              |                                                        |
| <sup>6</sup> Other care based visits (duration)                                                                                                                                                                                                                                                                   |                       |                 |               |                                              |                                                        |

1  
2  
3  
4 Of the 803 cohort participants 687 (85.55%) completed the REALM  
5 questionnaire. The 116 non-responders were excluded from the analyses.  
6 Non-responders lived in more socio-economically deprived areas and had  
7 received fewer years of education than those who completed the REALM.  
8 There was no difference in ethnicity (responders vs. non-responders).  
9  
10  
11  
12

13  
14 Of the 687 participants who completed the REALM, 106 (15.43%) had low  
15 health literacy. For the multivariable analysis 28 patients could not be included  
16 due to missing predictor variable data, leaving a total sample of 659.  
17  
18  
19

20  
21 Exploratory univariable analyses showed that people with low health literacy  
22 were more likely to be male, from a non-white ethnic group, live in a more  
23 deprived area, have spent fewer years in education, and were less likely to be  
24 employed. Age was borderline significant with people with low health literacy  
25 being slightly younger than people with adequate health literacy (difference in  
26 mean age between groups 2.22 years).  
27  
28  
29  
30  
31

32 The variables remaining in the final multivariable model were age, gender,  
33 ethnicity (white versus other), IMD score, years of education, employment;  
34 BMI and alcohol intake, and anxiety scores (Hospital Anxiety and Depression  
35 Scale (HADS)) (15). There was an 8% increase in the odds of low health  
36 literacy for every single unit increase in the anxiety score on HADS (range 0-  
37 21).  
38  
39  
40  
41  
42  
43

44 Service use analysis (univariable only) showed that people with low health  
45 literacy had significantly more, and longer, GP practice nurse consultations  
46 than people with adequate health literacy, but other service use showed no  
47 differences between groups.  
48  
49  
50  
51

## 52 **Discussion**

### 53 *Key findings*

54  
55 This study confirms that the characteristics of patients with low health literacy  
56 on UK GP CHD registers are similar to those seen in other long-term  
57  
58  
59  
60

1  
2  
3 conditions in studies undertaken in other industrialised countries (i.e.,  
4 membership of a minority ethnic group, socio-economic deprivation, fewer  
5 years in education, and lower income (9)). In contrast to other studies (3-6),  
6 the patients with low health literacy in our study were slightly younger than the  
7 patients with adequate health literacy, although the difference between groups  
8 was small and should be interpreted with caution. We found the prevalence  
9 of low health literacy to be close to that predicted from national general  
10 literacy levels (7).

11  
12  
13  
14  
15  
16  
17  
18 In addition people on GP CHD registers who have higher anxiety levels are  
19 more likely to have low health literacy than people with lower anxiety levels.  
20 This persists in the multivariable model, indicating an association over and  
21 above that already known to exist between anxiety and low socio-economic  
22 status (16, 17). This may reflect the findings of Ussher et al that CHD patients  
23 with low health literacy have increased difficulty understanding information,  
24 less knowledge of heart problems, and increased discomfort about asking for  
25 explanations (18). The finding in the univariable analysis that patients with low  
26 health literacy had more contact with practice nurses but not with other health  
27 services requires further investigation.  
28  
29  
30  
31  
32  
33  
34  
35

### 36 *Study limitations*

37  
38 As a cross-sectional study this project cannot demonstrate causality or the  
39 impact of low health literacy over time.  
40  
41  
42

43 Our findings may underestimate of the true picture; the 14.45% of participants  
44 who declined to do the REALM share the characteristics of people with low  
45 health literacy and may have declined because of reading difficulties.  
46  
47  
48

49 Our findings of more frequent, and longer, GP practice nurse consultations  
50 should be interpreted with caution, as this was found during univariable  
51 analysis with no other factors controlled for; no service use data were entered  
52 into the multivariable model. The above preliminary finding thus requires more  
53 detailed health economic analysis and interpretation.  
54  
55  
56  
57  
58  
59  
60



1  
2  
3 Finally, the REALM, although highly correlated with tests of functional health  
4 and general literacy, is not itself a test of functional skills but of pronunciation.  
5  
6  
7

### 8 *Summary*

9  
10 Our findings indicate that there is a disadvantaged group of people on GP  
11 CHD registers who have low health literacy in addition to other socio-  
12 demographic barriers to health. A new finding is that these people have  
13 significantly higher anxiety levels than people with adequate health literacy.  
14  
15  
16

### 17 *Next steps*

18  
19 Our possible finding that people on GP CHD registers with lower health  
20 literacy consulted practice nurses more frequently will inform future Up-Beat  
21 pilot interventions (10) and our longitudinal cohort data will enable us to  
22 explore the impact of low health literacy on patients on GP CHD registers, and  
23 on their health service use.  
24  
25  
26  
27  
28

### 29 **Acknowledgements**

30  
31 Many thanks to the 16 South London practices who participated in the  
32 UPBEAT-UK study.  
33  
34  
35

36  
37 This report/article presents independent research commissioned by the  
38 National Institute for Health Research (NIHR) under its Programme Grants for  
39 Applied Research scheme (RP-PG-0606-1048). The views expressed in this  
40 publication are those of the author(s) and not necessarily those of the NHS,  
41 the NIHR or the Department of Health.  
42  
43  
44

45  
46 AT is partly employed by the NIHR Institute of Psychiatry and South London  
47 and Maudsley Foundation Trust Mental Health Biomedical Research Centre.  
48  
49  
50

### 51 **Data Sharing Statement**

52  
53 There are no additional unpublished data from this study.  
54

### 55 **Funding**

56  
57 None  
58  
59  
60



## References

1. Health Literacy: A Prescription to End Confusion. Washington DC: Institute of Medicine, 2004.
2. CSDH. Closing the gap in a generation: health equity through action on the social determinants of health. Final Report of the Commission on Social Determinants of Health. Geneva: World Health Organization, 2008.
3. Paasche-Orlow MK, Parker RM, Gazmararian JA, et al. The prevalence of limited health literacy. *J Gen Intern Med.* 2005;20(2):175-84. Epub 2005/04/20.
4. Rudd RE. Health literacy skills of U.S. adults. *Am J Health Behav.* 2007;31 Suppl 1:S8-18. Epub 2007/10/20.
5. Rootman I, Gordon-EI-Bihbety D. A Vision for a Health Literate Canada. Report of the Expert Panel on Health Literacy. Ottawa: Canadian Public Health Association, 2008.
6. Doyle G, Cafferkey K, Fullam J. European Health Literacy Survey (HLS-EU) Executive Summary. Dublin: University College Dublin, 2012.
7. Skills for Life Survey: Headline Findings. Department for Business Innovations and Skills 2011 Research report No.: 57.
8. Moser C. A fresh start: the report of the working party on literacy and numeracy. Department for Education and Employment, 1999.
9. Wolf MS, Gazmararian JA, Baker DW. Health literacy and functional health status in older adults. *Arch Int Med.* 2005;165:1946-52.
10. Tylee A, Ashworth M, Barley E, et al. Up-Beat UK: A programme of research into the relationship between coronary heart disease and depression in primary care patients. *BMC Family Practice* 2011;12(38) doi:10.1186/1471-2296-12-38.
11. Davis TC, Long SW, Jackson RH, et al. Rapid Estimate of Adult Literacy in Medicine: A Shortened Screening Instrument. *Family Medicine.* 1993;25(6):391-5.
12. Parker RM, Baker DW, Williams MV, et al. The Test of Functional Health Literacy in Adults (TOFHLA): a new instrument for measuring patients' literacy skills. *J Gen Intern Med.* 1995;10:537-42.

- 1  
2  
3 13. Weiss BD, Mays MZ, Martz W, et al. Quick assessment of literacy in  
4 primary care: the newest vital sign. *Ann Fam Med*. 2005;3(6):514-22. Epub  
5 2005/12/13.  
6
- 7  
8 14. Ibrahim SY, Reid F, Shaw A, et al. Validation of a health literacy  
9 screening tool (REALM) in a UK population with coronary heart disease. *J*  
10 *Public Health (Oxf)*. 2008;30(4):449-55. Epub 2008/07/29.  
11
- 12  
13 15. Hamilton M. Development of a rating scale for primary depressive  
14 illness. *Br J Soc Clin Psychol*. 1967;6(4):278-96. Epub 1967/12/01.  
15
- 16  
17 16. Wolff BC, Santiago CD, Wadsworth ME. Poverty and involuntary  
18 engagement stress responses: examining the link to anxiety and aggression  
19 within low-income families. *Anxiety Stress Coping*. 2009;22(3):309-25. Epub  
20 2009/03/03.  
21
- 22  
23 17. Najman JM, Hayatbakhsh MR, Clavarino A, et al. Family poverty over  
24 the early life course and recurrent adolescent and young adult anxiety and  
25 depression: a longitudinal study. *Am J Public Health*. 2010;100(9):1719-23.  
26  
27 Epub 2010/07/17.  
28
- 29  
30 18. Ussher M, Ibrahim S, Reid F, et al. Psychosocial correlates of health  
31 literacy among older patients with coronary heart disease. *J Health Commun*.  
32 2010;15(7):788-804. Epub 2010/11/26.  
33  
34  
35  
36  
37  
38  
39  
40  
41  
42  
43  
44  
45  
46  
47  
48  
49  
50  
51  
52  
53  
54  
55  
56  
57  
58  
59  
60

1  
2  
3 **Characteristics of people with low health literacy on coronary heart**  
4 **disease GP registers in South London**

5  
6 **Lead, corresponding author and paper guarantor**

7  
8 **Gill Rowlands<sup>1</sup>**

9  
10 Professor of Health Disparities

11 Faculty of Health and Social Care

12 London South Bank University

13 London SE1 0AA

14 rowlang2@lsbu.ac.uk  
15  
16  
17  
18  
19

20 **Co-authors**

21 **Anita Mehay<sup>2</sup>** BSc (Hons) MSc. Research Assistant

22 **Sally Hampshire<sup>1</sup>** BSc MSc Research Assistant

23 **Rachel Phillips<sup>2</sup>** BSc MSc GradStat. Research Fellow

24 **Paul Williams<sup>2</sup>** BSc MPH. Statistician.

25 **Anthony Mann<sup>2</sup>** MD FRCP FRCPsych. Emeritus Professor

26 **Andrew Steptoe<sup>3</sup>** BA MA DPhil DSC. British Heart Foundation Professor of  
27 Psychology

28 **Paul Walters<sup>2</sup>** PhD MRCPsych. Research Fellow

29 **Andre Tylee<sup>2</sup>** MD FRCGP MRCPsych. Head, Section of Primary Care Mental  
30 Health  
31  
32

33  
34  
35 **Word count: abstract 300 words, main text 1303 words.**  
36  
37  
38  
39

40  
41  
42 **Study design:** cross-sectional survey  
43  
44  
45

46 **Statements:** The Corresponding Author has the right to grant on behalf of all  
47 authors and does grant on behalf of all authors, an exclusive licence (or non  
48 exclusive for government employees) on a worldwide basis to the BMJ  
49 Publishing Group Ltd to permit this article (if accepted) to be published in BMJ  
50 editions and any other BMJ PGL products and sublicences such use and  
51  
52  
53  
54

55  
56 <sup>1</sup> London South Bank University

57 <sup>2</sup> Institute of Psychiatry, Kings College London

58 <sup>3</sup> University College London  
59  
60

1  
2  
3 exploit all subsidiary rights, as set out in their licence.  
4  
5

6 Competing interests: AT is partly employed by the NIHR Institute of Psychiatry  
7 and South London and Maudsley Foundation Trust Mental Health Biomedical  
8 Research Centre.  
9  
10

11  
12 All authors have completed the Unified Competing Interest form  
13 **at**[www.icmje.org/coi\\_disclosure.pdf](http://www.icmje.org/coi_disclosure.pdf) (available on request from the  
14 corresponding author) and declare: no support from any organisation for the  
15 submitted work, no financial relationships with any organisations that might  
16 have an interest in the submitted work in the previous three years, no other  
17 relationships or activities that could appear to have influenced the submitted  
18 work.  
19  
20  
21  
22  
23

24 **Contributions:**

25  
26 GR Led on development of the research idea, contributed to interpretation of  
27 result, and led on writing the paper  
28

29 AM collected research data and contributed to interpretation of results and  
30 writing the paper  
31

32 SH collected research data and contributed to interpretation of results and  
33 writing the paper  
34

35 RP led on statistical analysis of the data and interpretation of the results  
36

37 PW conducted additional statistical analysis and contributed to the paper  
38

39 AM co-developed the UPBEAT cohort study in which the study is sited,  
40 contributed to the research idea, contributed to interpretation of results and  
41 writing the paper  
42  
43

44 AS contributed to the project design, analysis of results and writing the paper  
45

46 PW contributed to the research idea, interpretation of the results and writing  
47 the paper  
48

49 AT led on the development of the UPBEAT cohort study in which the study is  
50 sited, contributed to the research idea, contributed to interpretation of results  
51 and writing the paper.  
52  
53  
54

55  
56 All authors have approved the final version  
57  
58  
59  
60

**Abstract (299 words)**

*Objective.* To explore characteristics associated with, and prevalence of, low health literacy in patients recruited to investigate the role of depression in patients on General Practice (GP) Coronary Heart Disease (CHD) registers (the Up-Beat UK study).

*Design.* Cross-sectional cohort. The health literacy measure was the Rapid Estimate of Health Literacy in Medicine (REALM). Univariable analyses identified characteristics associated with low health literacy and compared health service use between health literacy statuses. Those variables where there was a statistically significant/borderline significant difference between health literacy statuses were entered into a multivariable model.

*Setting.* 16 general practices in south London, UK.

*Participants:* Inclusion: patients >18 years, registered with a GP and on a GP CHD register. Exclusion: patients temporarily registered.

*Primary outcome measure:* REALM.

*Results.* Of the 803 Up-Beat cohort participants, 687 (85.55%) completed the REALM of whom 106 (15.43%) had low health literacy. **Twenty-eight participants could not be included in the multivariable analysis due to missing predictor variable data, leaving a sample of 659.** The variables remaining in the final model were age, gender, ethnicity, IMD score, years of education, employment; BMI and alcohol intake, and anxiety scores (Hospital Anxiety and Depression Scale (HADS)). Univariable analysis also showed that people with low health literacy may have more, and longer, practice nurse consultations than people with adequate health literacy.

*Conclusions.* There is a disadvantaged group of people on GP CHD registers with low health literacy. The multivariable model showed that patients with low health literacy have significantly higher anxiety levels than people with adequate health literacy. In addition, the univariable analyses show that such patients have more, and longer, consultations with practice nurses. We will collect 4-year longitudinal cohort data to explore the impact of health literacy in people on GP CHD registers and the impact of health literacy on health service use.

## Article summary

### Article focus

- Identifying the prevalence and characteristics of people with CHD and low health literacy on coronary heart disease GP registers in South London, UK

### Key Messages

- The characteristics of patients with low health literacy on UK GP CHD registers are similar to those seen in other long-term conditions in studies undertaken in other industrialised countries
- The prevalence of low health literacy to be close to that predicted from national general literacy levels at 15%
- People on GP CHD registers who have higher anxiety levels are more likely to have low health literacy than people with lower anxiety levels

### Strengths

- The data were collected within a prospective cohort study
- There were a wide range of sociodemographic data collected enabling characteristics of patients with low health literacy to be described
- The simultaneous collection of psychological and service use data enabled these to be compared between patients with low and adequate health literacy

### Limitations

- As a cross-sectional study this project cannot demonstrate causality or the impact of low health literacy over time.
- The findings may underestimate of the true picture; the participants who declined to do the REALM may have declined because of reading difficulties.
- Our findings of more frequent, and longer, GP practice nurse consultations should be interpreted with caution; the above preliminary finding requires more detailed health economic analysis and interpretation
- The REALM, although highly correlated with tests of functional health and general literacy, is not itself a test of functional skills but of pronunciation

## Introduction

Health literacy, 'the cognitive and social skills that determine the motivation and ability of individuals to (access), understand and use information in ways that promote and maintain good health' (1) is a social determinant of health (2). Whilst associated with other social determinants e.g. ethnicity, income, education, and socio-demographic status (SES), it has an independent association with poor health (3). **International comparisons of health literacy levels are hampered by differing national definitions; however it is clear that health literacy is an important issue in many industrialised nations. The proportion of the population thought to be disadvantaged through low health literacy ranges from 19% in the US (4) to 55% in Canada (5). A recent survey of health literacy in Europe, where a common definition of health literacy was adopted, shows a range of health literacy skills between nations, with the proportion of the population having suboptimal health literacy skills ranging from 27.3% in the Netherlands to 61.4% in Bulgaria (6).** There are no data on health literacy levels in England; however the 2011 national skills survey has shown that 15% of the adult population (=5 million people) are 'functionally illiterate' (7) (i.e. have insufficient literacy skills to achieve their potential in life and society (8)). It is reasonable to assume that a similar proportion also have low health literacy.

Low health literacy has greatest impact in complex health conditions when patients have to understand procedures, manage medication, and attend multiple appointments. US studies have shown that adults with low health literacy have a higher prevalence of diabetes and heart failure, worse physical and mental health, and higher all-cause mortality (9). There is little research on low health literacy and coronary heart disease (CHD), prompting us to explore this within a longitudinal cohort of patients recruited to investigate the role of depression in patients on General Practice (GP) CHD registers (10). This short report presents initial findings on the prevalence and characteristics of people with CHD and low health literacy.

## Method

The design, recruitment, power calculation, and measures used in the Up-

1  
2  
3 Beat cohort study are described elsewhere (10). The study was granted  
4 ethical approval by the Bexley and Greenwich Research Ethics Committee  
5 (REC Reference: 07/H0809/38) (10). Health literacy was measured using the  
6 Rapid Estimate of Health Literacy in Medicine (REALM) (11), a 66-item health  
7 word pronunciation test highly correlated with other measures of health  
8 literacy (12, 13) and widely used in research studies (3). **The version of the**  
9 **REALM validated for use in the UK was used. This groups people into 'low'**  
10 **and 'adequate' health literacy with people with a score of < 59 out of the**  
11 **possible 66 being considered to have low health literacy (14).**

12  
13  
14  
15  
16  
17  
18  
19  
20 Study design. A cross-sectional analysis of baseline data from the Up-Beat  
21 UK Cohort Study (10).

### 22 23 24 Statistical Analysis

25 **Initial exploratory univariable analysis was undertaken to identify factors**  
26 **independently associated with low health literacy using  $\chi^2$  tests (categorical**  
27 **variables) and t-tests (continuous variables). Multivariable regression analysis**  
28 **was then undertaken to identify those factors that remained significant when**  
29 **all those identified in the univariable analysis were considered together.**  
30 Those characteristics where there was a statistically significant ( $p < 0.05$ ) or  
31 borderline significant difference between people with low and adequate health  
32 literacy were entered into the multivariable model; logistic regression was  
33 used to model predictors of low health literacy. The fit for the model was  
34 assessed by the C statistic (ROC curve) and the Hosmer-Lemeshow  
35 goodness of fit  $\chi^2$  test.

36  
37  
38  
39  
40  
41  
42  
43  
44  
45  
46 Analyses were performed using Stata version 11.2.

### 47 48 49 **Results**

50  
51  
52  
53 Cohort characteristics are detailed elsewhere (10). Cohort recruitment and a  
54 study flow diagram are shown in figure 1.

55  
56  
57  
58 *Figure about here.*



The results of the univariable and multivariable analyses are shown in table 1.

**Table: Characteristics by Health Literacy**

|                                                                                                                                                                                                                                                                                                                   |                       | Health Literacy |               |                                                |                                                        |
|-------------------------------------------------------------------------------------------------------------------------------------------------------------------------------------------------------------------------------------------------------------------------------------------------------------------|-----------------------|-----------------|---------------|------------------------------------------------|--------------------------------------------------------|
|                                                                                                                                                                                                                                                                                                                   |                       | Adequate        | Low           |                                                |                                                        |
|                                                                                                                                                                                                                                                                                                                   |                       | N (%)           | N (%)         | Univariable analysis                           | Multivariable analysis                                 |
| Total                                                                                                                                                                                                                                                                                                             |                       | 581 (84.57)     | 106 (15.43)   | N=687                                          | N=659                                                  |
|                                                                                                                                                                                                                                                                                                                   |                       |                 |               | P-value <sup>(1)</sup>                         | Adjusted odds of having low health literacy (p-values) |
| <b>Socio-demographic characteristics</b>                                                                                                                                                                                                                                                                          |                       |                 |               |                                                |                                                        |
| Gender                                                                                                                                                                                                                                                                                                            | Male                  | 397 (68.33)     | 87 (82.08)    | 0.004                                          | 0.32 (<0.001)                                          |
|                                                                                                                                                                                                                                                                                                                   | Female                | 184 (31.67)     | 19 (17.92)    |                                                |                                                        |
| Ethnicity                                                                                                                                                                                                                                                                                                         | White                 | 524 (90.19)     | 81 (76.42)    | <0.001                                         | 3.12 (<0.001)                                          |
|                                                                                                                                                                                                                                                                                                                   | Other                 | 57 (9.81)       | 25 (23.58)    |                                                |                                                        |
| Age, Mean (SD)                                                                                                                                                                                                                                                                                                    | Years                 | 71.14 (10.41)   | 68.92 (11.84) | 0.049                                          | 1.00 (0.873)                                           |
| Index of Multiple Deprivation score, Mean (SD)                                                                                                                                                                                                                                                                    | Range 0-100           | 18.34 (13.84)   | 24.37 (13.24) | <0.001                                         | 1.02 (0.072)                                           |
| Time in education, Mean (SD)                                                                                                                                                                                                                                                                                      | Years                 | 12.01 (3.40)    | 10.92 (2.46)  | <0.001 <sup>(2)</sup>                          | 0.84 (0.001)                                           |
| Employment status                                                                                                                                                                                                                                                                                                 | Unemployed/student    | 14 (2.42)       | 10 (9.52)     | 0.001                                          | 0.138                                                  |
|                                                                                                                                                                                                                                                                                                                   | Paid employment       | 117 (20.21)     | 18 (17.14)    |                                                |                                                        |
|                                                                                                                                                                                                                                                                                                                   | Retired/Housewife     | 448 (77.37)     | 77 (73.33)    |                                                |                                                        |
| <b>Lifestyle Characteristics</b>                                                                                                                                                                                                                                                                                  |                       |                 |               |                                                |                                                        |
| Alcohol intake (Units)                                                                                                                                                                                                                                                                                            | Doesn't drink         | 136 (23.45)     | 44 (41.90)    | 0.001                                          | 0.002                                                  |
|                                                                                                                                                                                                                                                                                                                   | 1-10 units            | 289 (49.83)     | 44 (41.90)    |                                                |                                                        |
|                                                                                                                                                                                                                                                                                                                   | 11-20 units           | 87 (15.00)      | 9 (8.57)      |                                                |                                                        |
|                                                                                                                                                                                                                                                                                                                   | Greater than 21 units | 68 (11.72)      | 8 (7.62)      |                                                |                                                        |
| BMI                                                                                                                                                                                                                                                                                                               | Underweight/Normal    | 145 (25.62)     | 15 (14.29)    | 0.024                                          | 0.027                                                  |
|                                                                                                                                                                                                                                                                                                                   | Overweight            | 250 (44.17)     | 48 (45.71)    |                                                |                                                        |
|                                                                                                                                                                                                                                                                                                                   | Obese                 | 171 (30.21)     | 42 (40.00)    |                                                |                                                        |
| <b>Mental Health</b>                                                                                                                                                                                                                                                                                              |                       |                 |               |                                                |                                                        |
| Depression score, Mean (SD)                                                                                                                                                                                                                                                                                       |                       | 2.86 (3.14)     | 4.28 (3.76)   | <0.001 <sup>(2)</sup>                          |                                                        |
| Anxiety score, Mean (SD)                                                                                                                                                                                                                                                                                          |                       | 4.39 (4.13)     | 6.35 (5.18)   | <0.001 <sup>(2)</sup>                          | 1.08 (0.002)                                           |
| <b>Health utilisation in the 6 months prior to baseline</b>                                                                                                                                                                                                                                                       |                       |                 |               |                                                |                                                        |
| Number of practice nurse visits, Mean (SD)                                                                                                                                                                                                                                                                        |                       | 0.89 (1.85)     | 1.33 (2.21)   | 0.008 <sup>(3)</sup>                           |                                                        |
| Duration of practice nurse visit, Mean (SD)                                                                                                                                                                                                                                                                       |                       | 4.98 (7.05)     | 6.98 (8.30)   | 0.008 <sup>(3)</sup>                           |                                                        |
| All other service use variables <sup>(4)</sup>                                                                                                                                                                                                                                                                    |                       |                 |               | 0.120 <sup>(5)</sup> -<br>0.793 <sup>(6)</sup> |                                                        |
| <sup>1</sup> P-value from t-test for continuous variables and chi-squared tests for categorical variables                                                                                                                                                                                                         |                       |                 |               |                                                |                                                        |
| <sup>2</sup> Unequal variances t-test used                                                                                                                                                                                                                                                                        |                       |                 |               |                                                |                                                        |
| <sup>3</sup> Wilcoxon rank sum test                                                                                                                                                                                                                                                                               |                       |                 |               |                                                |                                                        |
| <sup>4</sup> Number of Accident and Emergency visits, Day hospital and in-patient admissions (days), outpatient visits, GP visits (number, duration), district nurse visits (number, duration), other medical visits (number, duration), other care based visits (number, duration), informal care visits number. |                       |                 |               |                                                |                                                        |
| <sup>5</sup> Number of Accident and Emergency visits                                                                                                                                                                                                                                                              |                       |                 |               |                                                |                                                        |
| <sup>6</sup> Other care based visits (duration)                                                                                                                                                                                                                                                                   |                       |                 |               |                                                |                                                        |

1  
2  
3  
4 Of the 803 cohort participants 687 (85.55%) completed the REALM  
5 questionnaire. The 116 non-responders were excluded from the analyses.  
6 Non-responders lived in more socio-economically deprived areas and had  
7 received fewer years of education than those who completed the REALM.  
8 There was no difference in ethnicity (responders vs. non-responders).  
9

10  
11  
12  
13  
14 Of the 687 participants who completed the REALM, 106 (15.43%) had low  
15 health literacy. For the multivariable analysis 28 patients could not be included  
16 due to missing predictor variable data, leaving a total sample of 659.  
17  
18

19  
20 Exploratory univariable analyses showed that people with low health literacy  
21 were more likely to be male, from a non-white ethnic group, live in a more  
22 deprived area, have spent fewer years in education, and were less likely to be  
23 employed. Age was borderline significant with people with low health literacy  
24 being slightly younger than people with adequate health literacy (difference in  
25 mean age between groups 2.22 years).  
26  
27  
28  
29

30  
31  
32 The variables remaining in the final multivariable model were age, gender,  
33 ethnicity (white versus other), IMD score, years of education, employment;  
34 BMI and alcohol intake, and anxiety scores (Hospital Anxiety and Depression  
35 Scale (HADS)) (15). There was an 8% increase in the odds of low health  
36 literacy for every single unit increase in the anxiety score on HADS (range 0-  
37 21).  
38  
39  
40  
41  
42

43  
44 Service use analysis (univariable only) showed that people with low health  
45 literacy had significantly more, and longer, GP practice nurse consultations  
46 than people with adequate health literacy, but other service use showed no  
47 differences between groups.  
48  
49

## 50 51 **Discussion**

### 52 *Key findings*

53  
54 This study confirms that the characteristics of patients with low health literacy  
55 on UK GP CHD registers are similar to those seen in other long-term  
56  
57  
58  
59  
60

1  
2  
3 conditions in studies undertaken in other industrialised countries (i.e.,  
4 membership of a minority ethnic group, socio-economic deprivation, fewer  
5 years in education, and lower income (9)). In contrast to other studies (3-6),  
6 the patients with low health literacy in our study were slightly younger than the  
7 patients with adequate health literacy, although the difference between groups  
8 was small and should be interpreted with caution. We found the prevalence  
9 of low health literacy to be close to that predicted from national general  
10 literacy levels (7).

11  
12  
13  
14  
15  
16  
17  
18 In addition people on GP CHD registers who have higher anxiety levels are  
19 more likely to have low health literacy than people with lower anxiety levels.  
20 This persists in the multivariable model, indicating an association over and  
21 above that already known to exist between anxiety and low socio-economic  
22 status (16, 17). This may reflect the findings of Ussher et al that CHD patients  
23 with low health literacy have increased difficulty understanding information,  
24 less knowledge of heart problems, and increased discomfort about asking for  
25 explanations (18). The finding in the univariable analysis that patients with low  
26 health literacy had more contact with practice nurses but not with other health  
27 services requires further investigation.

### 28 29 30 31 32 33 34 35 36 *Study limitations*

37 As a cross-sectional study this project cannot demonstrate causality or the  
38 impact of low health literacy over time.

39  
40  
41  
42  
43 Our findings may underestimate of the true picture; the 14.45% of participants  
44 who declined to do the REALM share the characteristics of people with low  
45 health literacy and may have declined because of reading difficulties.

46  
47  
48  
49  
50 Our findings of more frequent, and longer, GP practice nurse consultations  
51 should be interpreted with caution, as this was found during univariable  
52 analysis with no other factors controlled for; no service use data were entered  
53 into the multivariable model. The above preliminary finding thus requires more  
54 detailed health economic analysis and interpretation.

1  
2  
3 Finally, the REALM, although highly correlated with tests of functional health  
4 and general literacy, is not itself a test of functional skills but of pronunciation.  
5  
6  
7

### 8 *Summary*

9  
10 Our findings indicate that there is a disadvantaged group of people on GP  
11 CHD registers who have low health literacy in addition to other socio-  
12 demographic barriers to health. A new finding is that these people have  
13 significantly higher anxiety levels than people with adequate health literacy.  
14  
15  
16

### 17 *Next steps*

18  
19 Our possible finding that people on GP CHD registers with lower health  
20 literacy consulted practice nurses more frequently will inform future Up-Beat  
21 pilot interventions (10) and our longitudinal cohort data will enable us to  
22 explore the impact of low health literacy on patients on GP CHD registers, and  
23 on their health service use.  
24  
25  
26  
27  
28

### 29 **Acknowledgements**

30  
31 Many thanks to the 16 South London practices who participated in the  
32 UPBEAT-UK study.  
33  
34  
35

36  
37 This report/article presents independent research commissioned by the  
38 National Institute for Health Research (NIHR) under its Programme Grants for  
39 Applied Research scheme (RP-PG-0606-1048). The views expressed in this  
40 publication are those of the author(s) and not necessarily those of the NHS,  
41 the NIHR or the Department of Health.  
42  
43  
44  
45

46  
47 AT is partly employed by the NIHR Institute of Psychiatry and South London  
48 and Maudsley Foundation Trust Mental Health Biomedical Research Centre.  
49  
50  
51  
52  
53  
54  
55  
56  
57  
58  
59  
60

## References

1. Health Literacy: A Prescription to End Confusion. Washington DC: Institute of Medicine, 2004.
2. CSDH. Closing the gap in a generation: health equity through action on the social determinants of health. Final Report of the Commission on Social Determinants of Health. Geneva: World Health Organization, 2008.
3. Paasche-Orlow MK, Parker RM, Gazmararian JA, Nielsen-Bohlman LT, Rudd RR. The prevalence of limited health literacy. *J Gen Intern Med.* 2005;20(2):175-84. Epub 2005/04/20.
4. Rudd RE. Health literacy skills of U.S. adults. *Am J Health Behav.* 2007;31 Suppl 1:S8-18. Epub 2007/10/20.
5. Rootman I, Gordon-EI-Bihbety D. A Vision for a Health Literate Canada. Report of the Expert Panel on Health Literacy. Ottawa: Canadian Public Health Association, 2008.
6. Doyle G, Cafferkey K, Fullam J. European Health Literacy Survey (HLS-EU) Executive Summary. Dublin: University College Dublin, 2012.
7. Skills for Life Survey: Headline Findings. Department for Business Innovations and Skills 2011 Research report No.: 57.
8. Moser C. A fresh start: the report of the working party on literacy and numeracy. Department for Education and Employment, 1999.
9. Wolf MS, Gazmararian JA, Baker DW. Health literacy and functional health status in older adults. *Arch Int Med.* 2005;165:1946-52.
10. Tylee A, Ashworth M, Barley E, Brown J, Chambers J, Farmer A, et al. Up-Beat UK: A programme of research into the relationship between coronary heart disease and depression in primary care patients. *BMC Family Practice* 2011;12(38) doi:10.1186/1471-2296-12-38.
11. Davis TC, Long SW, Jackson RH, Mayeaux EJ, George RB, Murphy PW, et al. Rapid Estimate of Adult Literacy in Medicine: A Shortened Screening Instrument. *Family Medicine.* 1993;25(6):391-5.
12. Parker RM, Baker DW, Williams MV, Nurss JR. The Test of Functional Health Literacy in Adults (TOFHLA): a new instrument for measuring patients' literacy skills. *J Gen Intern Med.* 1995;10:537-42.

- 1  
2  
3  
4  
5  
6  
7  
8  
9  
10  
11  
12  
13  
14  
15  
16  
17  
18  
19  
20  
21  
22  
23  
24  
25  
26  
27  
28  
29  
30  
31  
32  
33  
34  
35  
36  
37  
38  
39  
40  
41  
42  
43  
44  
45  
46  
47  
48  
49  
50  
51  
52  
53  
54  
55  
56  
57  
58  
59  
60
13. Weiss BD, Mays MZ, Martz W, Castro KM, DeWalt DA, Pignone MP, et al. Quick assessment of literacy in primary care: the newest vital sign. *Ann Fam Med*. 2005;3(6):514-22. Epub 2005/12/13.
14. Ibrahim SY, Reid F, Shaw A, Rowlands G, Gomez GB, Chesnokov M, et al. Validation of a health literacy screening tool (REALM) in a UK population with coronary heart disease. *J Public Health (Oxf)*. 2008;30(4):449-55. Epub 2008/07/29.
15. Hamilton M. Development of a rating scale for primary depressive illness. *Br J Soc Clin Psychol*. 1967;6(4):278-96. Epub 1967/12/01.
16. Wolff BC, Santiago CD, Wadsworth ME. Poverty and involuntary engagement stress responses: examining the link to anxiety and aggression within low-income families. *Anxiety Stress Coping*. 2009;22(3):309-25. Epub 2009/03/03.
17. Najman JM, Hayatbakhsh MR, Clavarino A, Bor W, O'Callaghan MJ, Williams GM. Family poverty over the early life course and recurrent adolescent and young adult anxiety and depression: a longitudinal study. *Am J Public Health*. 2010;100(9):1719-23. Epub 2010/07/17.
18. Ussher M, Ibrahim S, Reid F, Shaw A, Rowlands G. Psychosocial correlates of health literacy among older patients with coronary heart disease. *J Health Commun*. 2010;15(7):788-804. Epub 2010/11/26.

1  
2  
3  
4  
5  
6  
7  
8  
9  
10  
11  
12  
13  
14  
15  
16  
17  
18  
19  
20  
21  
22  
23  
24  
25  
26  
27  
28  
29  
30  
31  
32  
33  
34  
35  
36  
37  
38  
39  
40  
41  
42  
43  
44  
45  
46  
47  
48  
49  
50  
51  
52  
53  
54  
55  
56  
57  
58  
59  
60

**Exploring indicators of low health literacy in a cohort with symptomatic Coronary Heart Disease**

**Figure: Study recruitment: Consort diagram**

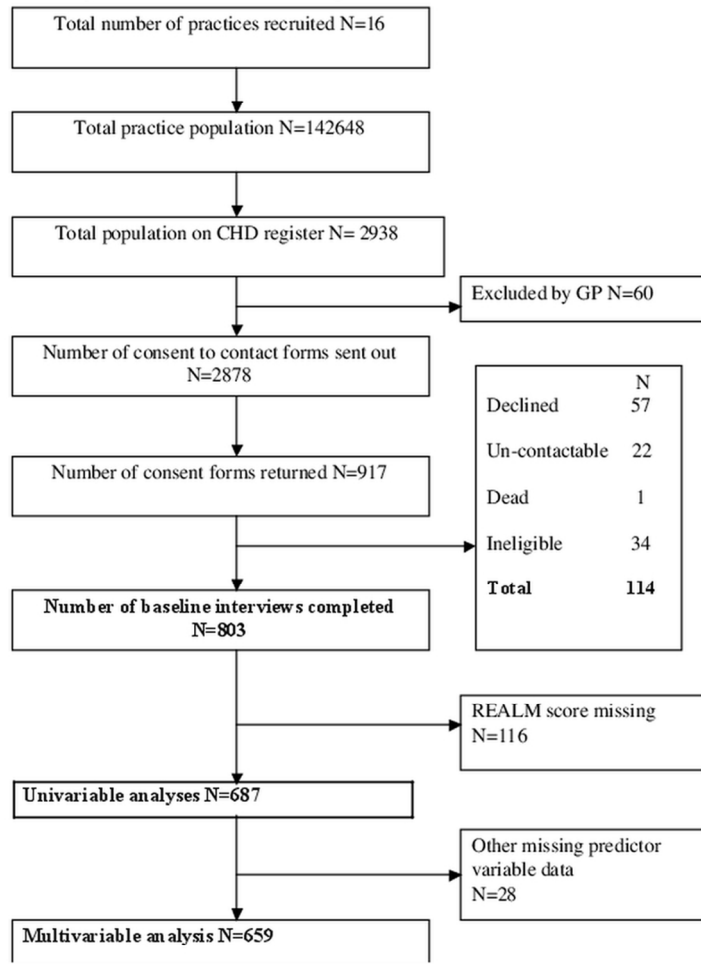

90x125mm (300 x 300 DPI)
